# Supplementary material
Source: PubMed Central journal article supplement (PMC8502150)

Supplementary information to: Maddaloni E et al., “**Impact of cardiovascular disease on clinical outcomes in hospitalized patients with Covid-19: a systematic review and meta-analysis**”

**Supplementary Figure S1. Funnel plot for studies investigating the outcome of death**

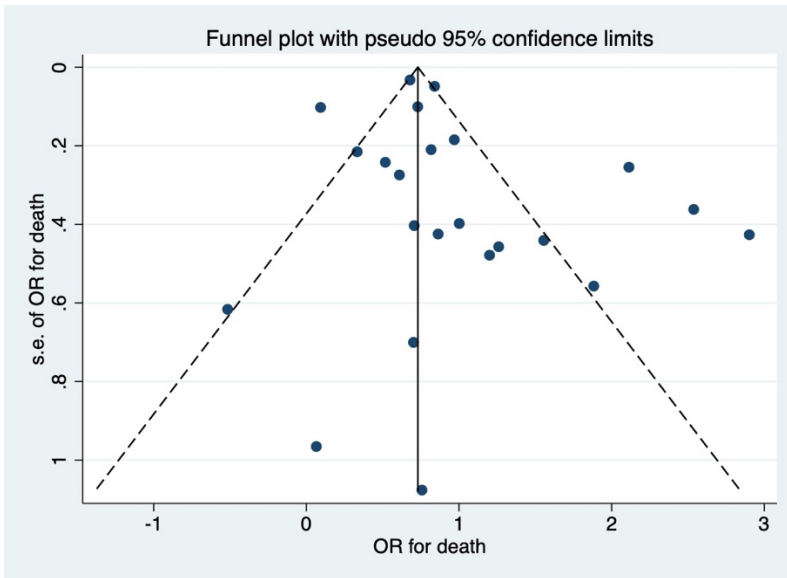

**Supplementary Figure S2. Funnel plot for studies investigating composite outcomes**

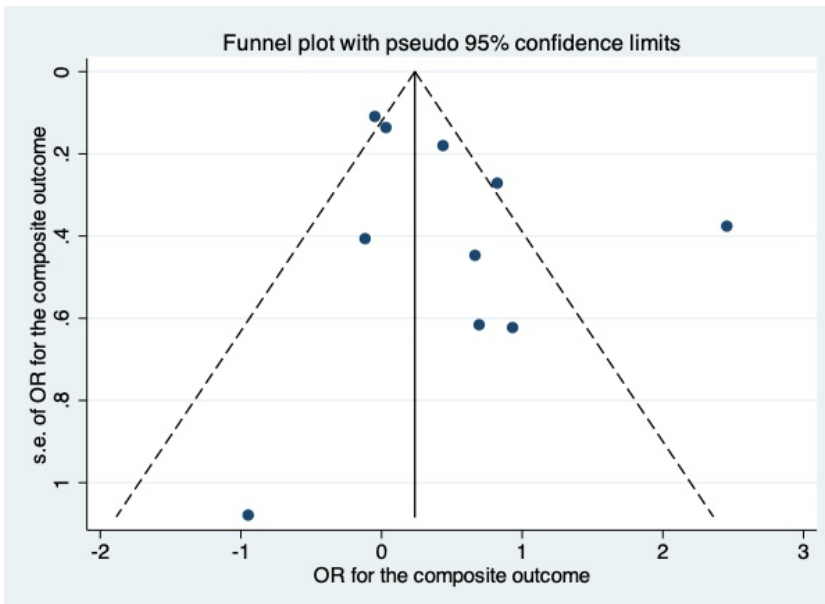

Supplement: 11739_2021_2804_MOESM1_ESM.pdf [file 11739_2021_2804_MOESM1_ESM.pdf]
